# Supplementary material
Source: publisher site journal article supplement (https://www.dovepress.com/article/291638)
Supplement: Supplementary file 1 [file get_supplementary_file.php]

# Cell STR Certification Report

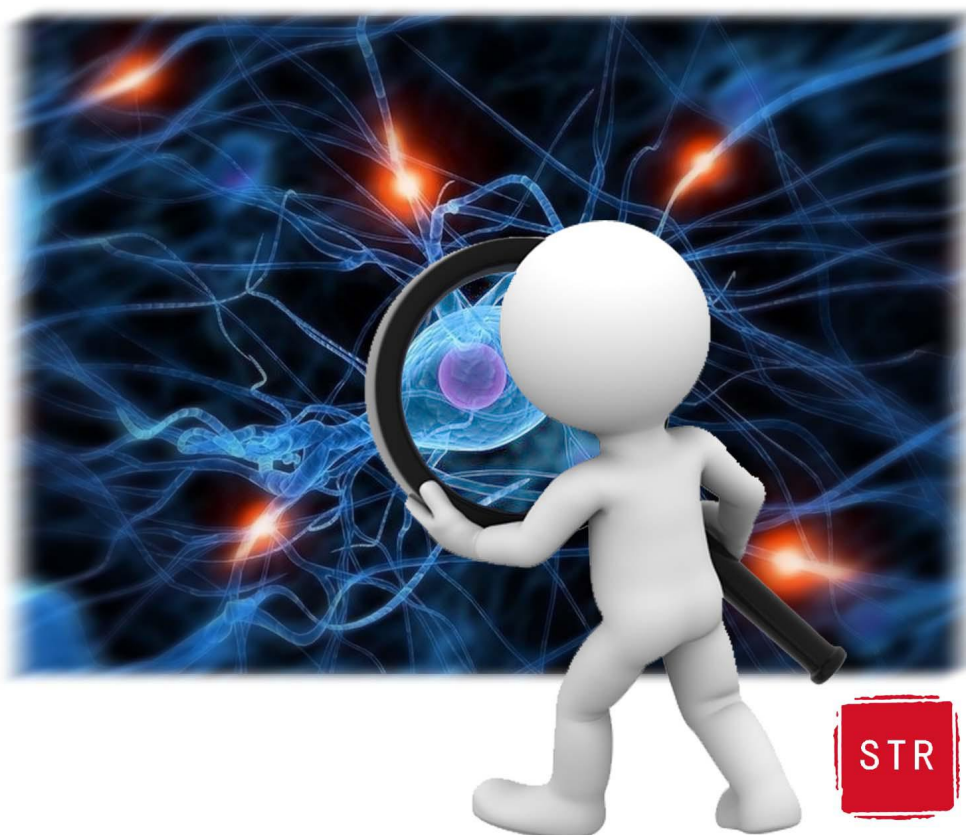

 **JENNIO Biological Technology**

TEL: +86-020-29185636; +86-020-22154480

Address: 31 KeFeng Road, Luogang District, 510663, Guangzhou, China

Web: <http://jennio-bio.com/>

- 1、 Sample ID: HepG2
- 2、 Original Material: Cell pellets
- 3、 Check time:2020-10-21
- 4、 Methods:

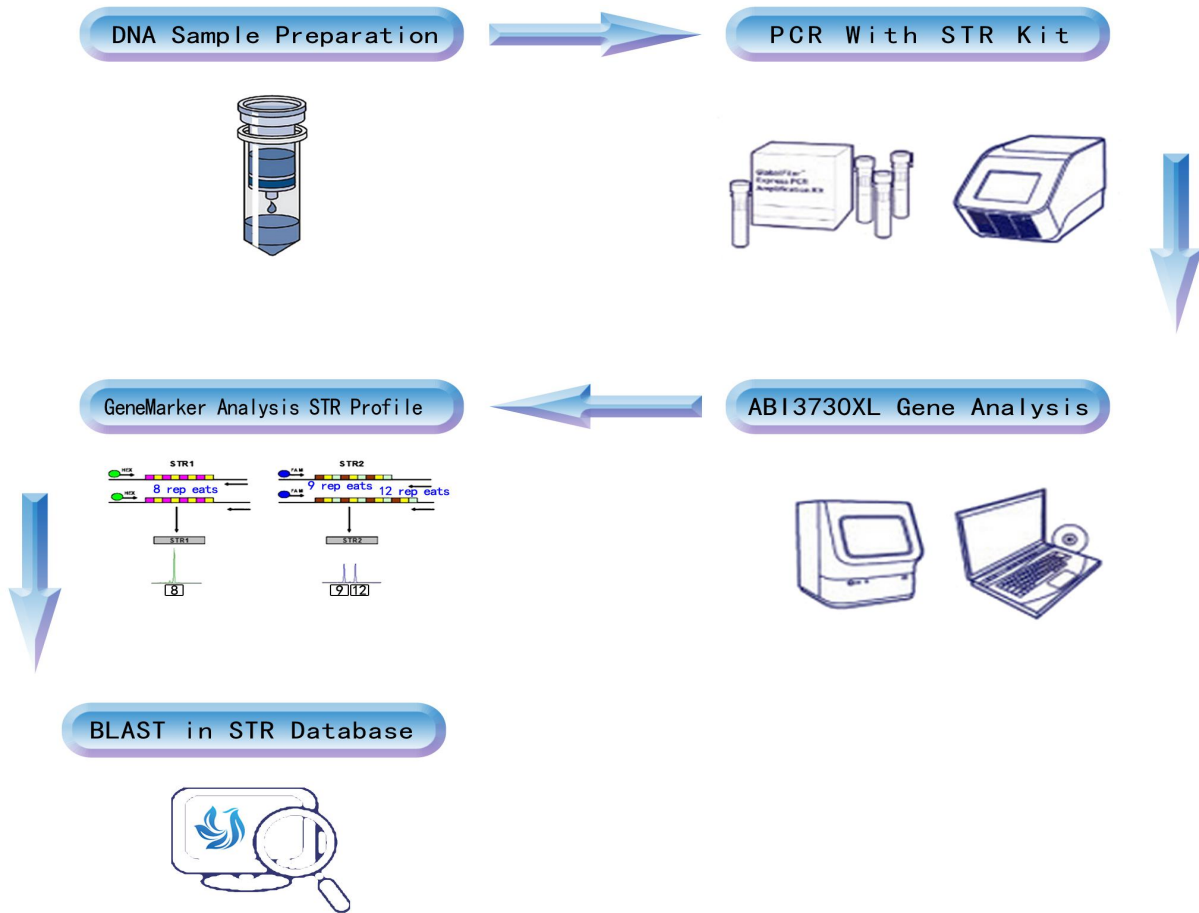

5、 Results:

Negative and positive test results are correct.

Amplification map of Genomic DNA clear, Genotyping results well.

STR Profile :

| Genetic Site | Customer sample |    | ATCC  |    |
|--------------|-----------------|----|-------|----|
|              | HepG2           |    | HepG2 |    |
| Amelogenin   | X               | Y  | X     | Y  |
| CSF1PO       | 10              | 11 | 10    | 11 |
| D13S317      | 9               | 13 | 9     | 13 |
| D16S539      | 12              | 12 | 12    | 12 |
| D5S818       | 11              | 12 | 11    | 12 |
| D7S820       | 10              | 10 | 10    | 10 |
| THO1         | 9               | 9  | 9     | 9  |
| TPOX         | 8               | 9  | 8     | 9  |
| vWA          | 17              | 17 | 17    | 17 |

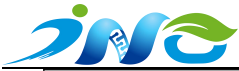

Percent match between the sample and the database profile: 100%

6、 Summary:

The result of STR profile showed no more than 2 distinct alleles were found ,the sample derived from a common ancestry(Figure 1); which matched 100% the reference cell line in the ATCC STR database, named HepG2 .

Notes:

- $P=100\% \times (2 \times M)/N$ ;  $M=18$ ,  $N=36$ ,  $P=100\% \times (2 \times 18)/36=100\%$   
M: number of the matching peaks; N: number of all peaks
- Based on ASN-0002-2011 Standard , cell lines with  $\geq 80\%$  match are considered to be related ; i.e.,derived from a common ancestry. Cell lines with between a 55% to 80% match require futher profiling for authentication of relatedness.
- This data and analysis are for research use only.

Operator: Yuqiu Qin

Auditor:

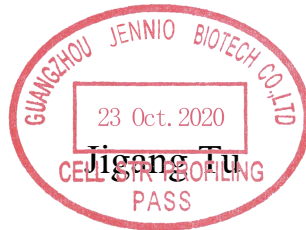

Report time: 2020-10-23

Figure:

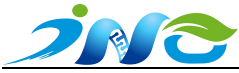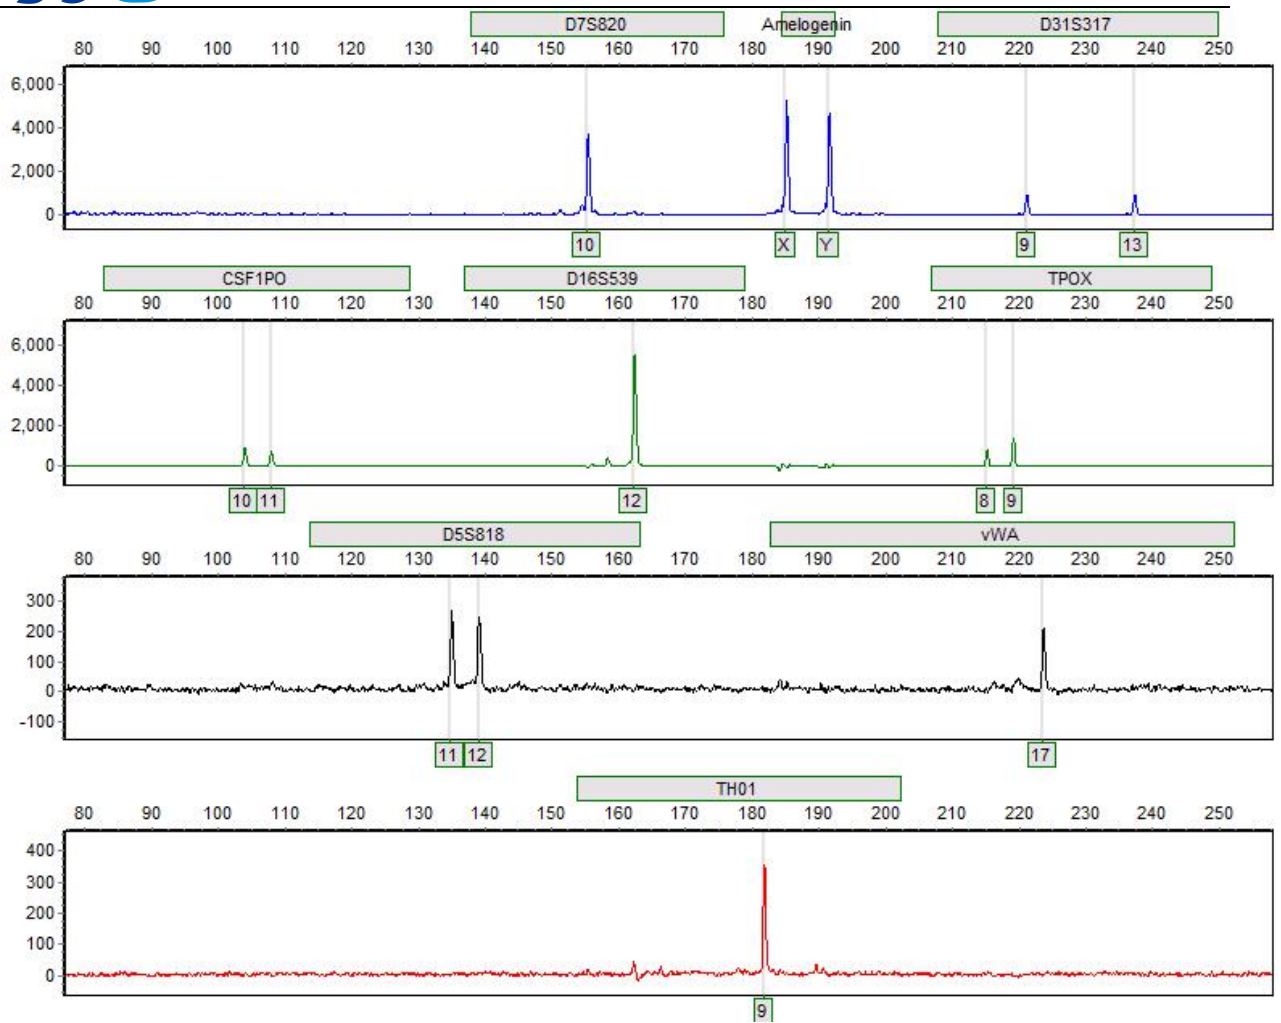

Figure 1.STR profiles of HepG2 cell line
